# Supplementary material for: Plasma Sequencing for Patients with GIST—Limitations and Opportunities in an Academic Setting
Source: MDPI journal article supplement (doi:10.3390/cancers14225496), 2022-11-09

## Supplementary Material

| ID  | KIT mutation (AA) | pipeline 1 |      | pipeline 2 |      | Database |
|-----|-------------------|------------|------|------------|------|----------|
|     |                   | VAF (%)    | Cov. | VAF (%)    | Cov. |          |
| F-1 | E490K             | 1.28       | 1097 |            |      | Cosmic   |
|     | M552_V559del      | 1.16       | 1720 |            |      | none*    |
|     | <b>V569A</b>      | 0.99       | 1624 |            |      | Cosmic   |
| F-2 | F469L             | 1.03       | 1455 |            |      | Cosmic   |
|     | N819Y             | 0.66       | 1213 |            |      | Cosmic   |
| F-3 | N486D             | 1.29       | 773  |            |      | Cosmic   |
|     | I817T             | 0.88       | 3165 |            |      | Cosmic   |
|     | N680K             |            |      | 4.09       | 600  | Cosmic°  |
|     | K704*             |            |      | 2.70       | 345  | Cosmic   |
| F-4 | <b>V559A</b>      | 1.27       | 553  |            |      | Clinvar  |
|     | P577L             | 1.83       | 546  |            |      | Cosmic   |
|     | C844R             |            |      | 2.82       | 314  | none     |
| F-5 | <b>V559A</b>      | 1.14       | 1846 |            |      | Clinvar  |
|     | P573L             | 1.19       | 1845 |            |      | Cosmic   |
|     | E671G             |            |      | 3.23       | 118  | none     |
|     | S453F             |            |      | 1.79       | 2263 | none     |
| M-1 | <b>V559A</b>      | 1.89       | 1536 |            |      | Clinvar  |
|     | P832S             |            |      | 2.63       | 550  | none     |
| M-2 | <b>V569A</b>      | 1.09       | 2568 |            |      | Cosmic   |
|     | S688*             |            |      | 3.00       | 523  | none     |
| M-3 | <b>V559A</b>      | 0.59       | 1703 |            |      | Clinvar  |
|     | A629V             |            |      | 1.80       | 2826 | none     |
|     | L679*             |            |      | 3.38       | 568  | none     |
| M-4 | R586*             | 0.52       | 3280 |            |      | Cosmic   |
|     | K818E             | 0.85       | 1760 |            |      | Cosmic   |
|     | I817N             |            |      | 2.56       | 3450 | none     |
| M-5 | <b>V559A</b>      | 0.81       | 1235 |            |      | Clinvar  |
|     | E562G             | 1.12       | 1250 |            |      | Cosmic   |
|     | W582*             | 1.01       | 891  |            |      | Cosmic   |

Suppl. Table 1: Panel sequencing (V2) of manually extracted healthy donor cfDNA and subsequent use of different pipelines for analysis led to detection of various different genetic aberrations in KIT. Recurrent aberrations by one method are marked in bold letters. F: female, M: male. °mutation found in GIST, \* stop codon.

## Supplemental Figure S1

**Supplemental-Figure S1:** ddPCR spike-in experiments to determine sensitivity and specificity for T670I and V654A primer-probe-pairs. **A:** No template controls (black: empty/ double negative droplets), 2 wells merged **B:** parental cell line GIST-T1 (green dots: wildtype-positive droplets), 2 wells merged. **C:** spike-in of mutant cell line into parental cell line (blue dots: mutation-positive droplets), 2 wells merged **D:** healthy donor cfDNA in high concentration, no detection of mutation-positive droplets, 4 wells merged. DNA concentrations are sum of all wells displayed in the graph.

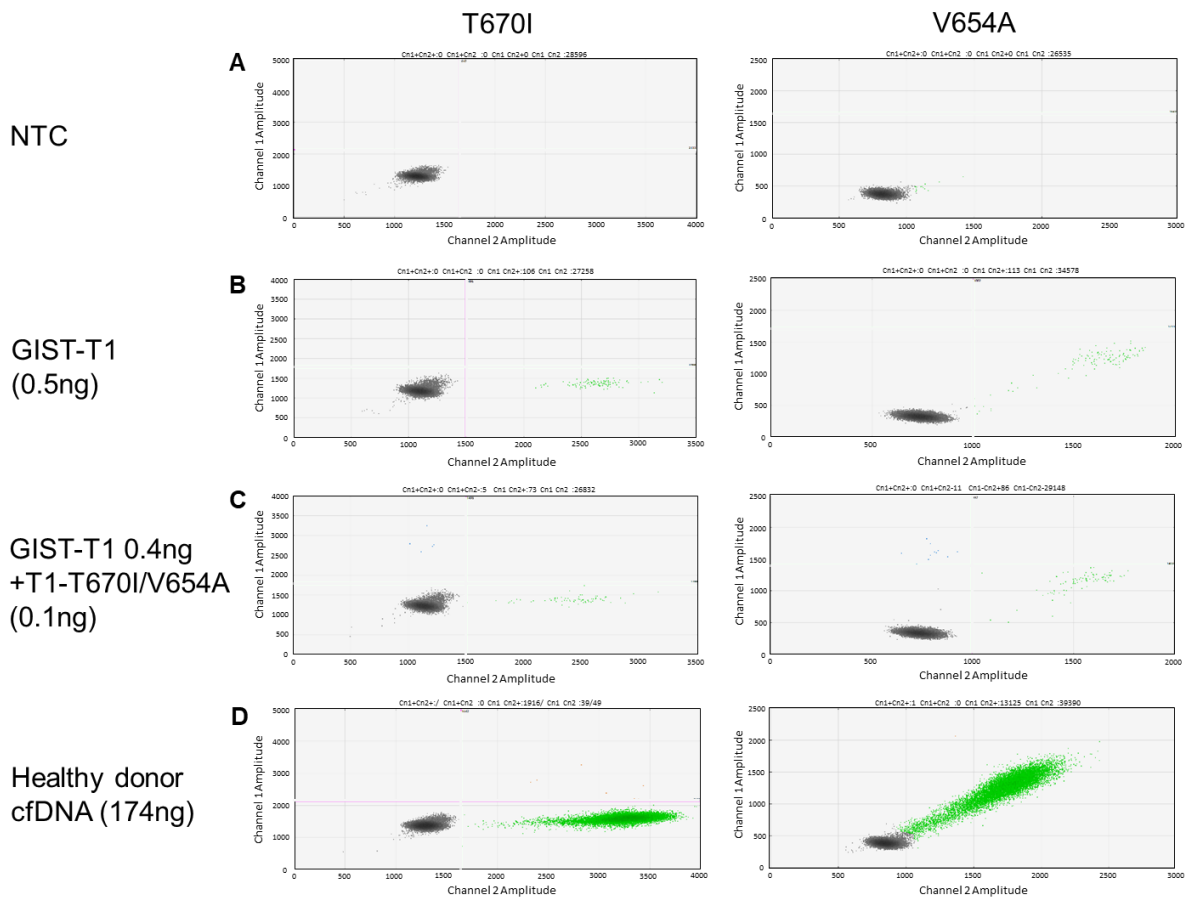

Supplement: s1 [file s1]
